# Supplementary material for: A bibliometric study of identity construction in English writing for academic purposes
Source: Front Psychol. 2024 Dec 10;15:1499917. doi: 10.3389/fpsyg.2024.1499917 (PMC11667089; doi:10.3389/fpsyg.2024.1499917)
Supplement: Supplementary file 1 [file Data_Sheet_1.xlsx]

## Sheet: Sheet1
		Title	Author	Year	Journal	Volume	Page
Web of science database	1	Practice-based research degree students in art and design: Identity and adaptation	Hockey, J	2003	International Journal of Art & Design Educaiton	22(1)	82-91
	2	Writing groups, change and academic identity: research development as local practice	Lee, A; Boud, D	2003	Studies in Higher Education	28(2)	187-200
	3	The "academic literacies" model: Theoryand applications	Lea, Mary R.; Street, Brian V.	2006	Theory into Practice	45(4)	368
	4	Disciplining writing: the case for multi-disciplinary writing groups to support writing for publication by higher degree by research candidates in the humanities, arts and social sciences	Cuthbert, D; Spark, C; Burke, E	2009	HIGHER EDUCATION RESEARCH & DEVELOPMENT	28(2)	137-149
	5	How research space is created in a diverse research world	Belcher, DD	2009	JOURNAL OF SECOND LANGUAGE WRITING	18(4)	221-234
	6	New lecturers and the myth of 'communities of practice'	Gourlay, L	2011	STUDIES IN CONTINUING EDUCATION	33(1)	67-77
	7	Negotiating the <i>Multi</i> in Multilingualism and Multiliteracies: Undergraduate Students in Vancouver, Canada	Marshall, S; Hayashi, H; Yeung, P	2012	CANADIAN MODERN LANGUAGE REVIEW-REVUE CANADIENNE DES LANGUES VIVANTES	68(1)	28-53
	8	Tutoring the end-of-studies dissertation: helping psychology students find their academic voice when revising academic texts	Castelló, M; Iñesta, A; Pardo, M; Liesa, E; Martínez-Fernández, JR	2012	HIGHER EDUCATION	63(1)	97-115
	9	Becoming an 'authorised' postgraduate research writer	James, B	2012	INNOVATIONS IN EDUCATION AND TEACHING INTERNATIONAL	49(1)	41-50
	10	Resistance by L2 writers: The role of racial and language ideology in imagined community and identity investment	Liu, PHE; Tannacito, DJ	2013	JOURNAL OF SECOND LANGUAGE WRITING	22(4)	355-373
	11	Restoring African studies to its linguistic identity: reflections on Ethiopian studies	Mendisu, BS; Yigezu, M	2014	SOCIAL DYNAMICS-A JOURNAL OF AFRICAN STUDIES	40(2)	289-307
	12	'I actually listened, I'm proud of myself.' The effects of a participatory pedagogy on students' constructions of academic identities	Tapp, J	2014	TEACHING IN HIGHER EDUCATION	19(4)	323-335
	13	"They ain't using slang": Working class students from linguistic minority communities in higher education	Preece, S	2015	LINGUISTICS AND EDUCATION	31	260-275
	14	Beyond deficit: graduate student research-writing pedagogies	Badenhorst, C; Moloney, C; Rosales, J; Dyer, J; Ru, LN	2015	TEACHING IN HIGHER EDUCATION	20(1)	1-11
	15	Developing that voice: locating academic writing tuition in the mainstream of higher education	Hathaway, J	2015	TEACHING IN HIGHER EDUCATION	20(5)	506-517
	16	Transitional and transformational spaces: mentoring young academics through writing centres	Archer, A; Parker, S	2016	EDUCATION AS CHANGE	20(1)	43-58
	17	From Practitioner to Researcher: Designing the Dissertation Process for Part Time Coursework Masters Students	Shaw, C;le Roux, K	2017	SYSTEMIC PRACTICE AND ACTION RESEARCH	30(4)	433-446
	18	Publishing and perishing: an academic literacies framework for investigating research productivity	Nygaard, LP	2017	STUDIES IN HIGHER EDUCATION	42(3)	519-532
	19	Development and validation of the Student Attitudes and Beliefs about Authorship Scale: a psychometrically robust measure of authorial identity	Cheung, KYF; Stupple, EJN; Elander, J	2017	STUDIES IN HIGHER EDUCATION	42(1)	97-114
	20	Academic voice: On feminism, presence, and objectivity in writing	Mitchell, KM	2017	NURSING INQUIRY	24(4)	1-8
	21	Second Language Graduate Students' Experiences at the Writing Center: A Language Socialization Perspective	Okuda, T; Anderson, T	2018	TESOL QUARTERLY	52(2)	391-413
	22	Academics' understandings of the authorial academic writer: a qualitative analysis of authorial identity	Cheung, KYF; Stupple, EJN; Elander, J; Flay, M	2018	STUDIES IN HIGHER EDUCATION	43(8)	1468-1483
	23	Academic writing as love	Kiriakos, CM; Tienari, J	2018	MANAGEMENT LEARNING	49(3)	263-277
	24	Chinese authorial identity: a model for scoring the Student Authorship Questionnaire	Ballantine, J; Guo, X; Larres, P; Yu, M	2018	STUDIES IN HIGHER EDUCATION	43(12)	2385-2397
	25	Identity work in the academic writing classroom: Where gender meets social class	Preece, S	2018	JOURNAL OF ENGLISH FOR ACADEMIC PURPOSES	32	9-20
	26	Writing groups as transformative spaces	Wilmot, K; McKenna, S	2018	HIGHER EDUCATION RESEARCH & DEVELOPMENT	37(4)	868-882
	27	Fail better': Reconsidering the role of struggle and failure in academic writing development in higher education	French, A	2018	INNOVATIONS IN EDUCATION AND TEACHING INTERNATIONAL	55(4)	408-416
	28	Writing Scholarship of Teaching and Learning Articles for Peer-Reviewed Journals	Healey, M; Matthews, KE; Cook-Sather, A	2019	TEACHING & LEARNING INQUIRY-THE ISSOTL JOURNAL	7(2)	28-50
	29	Power, pedagogy and the personal: feminist ethics in facilitating a doctoral writing group	Danvers, E;Hinton-Smith, T; Webb, R	2019	TEACHING IN HIGHER EDUCATION	24(1)	32-46
	30	Research in Vietnam: The experience of the humanities and social sciences	Pham, LT; Hayden, M	2019	JOURNAL OF INTERNATIONAL AND COMPARATIVE EDUCATION	8(1)	27-40
	31	The Power of Personal Connection for Undergraduate Student Writers	Eodice, M; Geller, AE; Lerner, N	2019	RESEARCH IN THE TEACHING OF ENGLISH	53(4)	320-339
	32	Reflections on writing and identity: exploring the role of qualifying exams in the sociocultural development of doctoral students	Fisher, R; Brock, CH; Frahm, T; Van Wig, A; Gillis, VR	2019	STUDIES IN CONTINUING EDUCATION	42(3)	365-380
	33	Pains and gains of working in Chinese universities: an academic returnee's journey	Ai, B	2019	HIGHER EDUCATION RESEARCH & DEVELOPMENT	38(4)	661-673
	34	Academic writing, scholarly identity, voice and the benefits and challenges of multilingualism: Reflections from Norwegian doctoral researchers in teacher education	Langum, V; Sullivan, KPH	2020	LINGUISTICS AND EDUCATION	60	1-10
	35	Academic writing as identity-work in higher education: forming a 'professional writing in higher education habitus'	French, A	2020	STUDIES IN HIGHER EDUCATION	45(8)	1605-1617
	36	Multiplex Aspects in the Construction of Academic Writer Identity among ESL Doctoral Students	Lo, YY; Othman, J; Lim, JW	2020	3L-LANGUAGE LINGUISTICS LITERATURE-THE SOUTHEAST ASIAN JOURNAL OF ENGLISH LANGUAGE STUDIES	26(3)	110-123
	37	Becoming academics: embracing and resisting changing writing practice	Katila, S; Laamanen, M; Laihonen, M; Lund, R; Merilainen, S; Rinkinen, J; Tienari, J	2020	QUALITATIVE RESEARCH IN ORGANIZATIONS AND MANAGEMENT	15(3)	315-330
	38	Beyond alienation: spatial implications of teaching and learning academic writing	Beighton, C	2020	TEACHING IN HIGHER EDUCATION	25(2)	205-222
	39	Xenolexia's positivity: the alterity of academic writing and its pedagogical implications	Beighton, C	2020	TEACHING IN HIGHER EDUCATION	28(2)	423-438
	40	Learning from contrasts: first-year students writing themselves into academic literacy	Roald, GM; Wallin, P; Hybertsen, ID; Stenoien, JM	2020	JOURNAL OF FURTHER AND HIGHER EDUCATION	45(6)	758-770
	41	Three-phase model of scholarly growth in teacher education	Shagrir, L	2020	EUROPEAN JOURNAL OF TEACHER EDUCATION	44(2)	271-291
	42	"No one would like to take a risk": Multilingual students' views on language mixing in academic writing	Kafle, M	2020	SYSTEM	94	1-10
	43	The Socialization of L2 Doctoral Students through Written Feedback	Anderson, T	2020	JOURNAL OF LANGUAGE IDENTITY AND EDUCATION	20(2)	134-149
	44	Unpacking vulnerability in academic writing and publishing: a tale of two non-native English speaker scholars in China	Yuan, R; Bai, B; Hou, SM	2020	HIGHER EDUCATION RESEARCH & DEVELOPMENT	41(3)	981-995
	45	Developing a student-doctoral education fit analytical model to assess performance	Ward, AM; Brennan, NM	2020	STUDIES IN HIGHER EDUCATION	45(7)	1448-1460
	46	Navigating the doctorate: a reflection on the journey of 'becoming' a PhD in applied language sciences	Nartey, M	2021	COGENT EDUCATION	8(1)	1-13
	47	Integrating social justice-oriented content into English for Academic Purposes (EAP) instruction: A case study	Mortenson, L	2021	ENGLISH FOR SPECIFIC PURPOSES	65(1)	1-14
	48	An autobiographical narrative inquiry of academic identity construction of PhD candidates through L2 authorship development	Asadolahi, S; Nushi, M	2021	HELIYON	7(2)	1-11
	49	Introducing Translanguaging in an EAP Course at a Joint-Venture University in China	Hiller, KE	2021	RELC JOURNAL	52(2)	307-317
	50	Chinese graduate students' translanguaging practice in the context of academic writing in English	Zhang, XZ; Hadjioannou, X	2021	APPLIED LINGUISTICS REVIEW	13(3)	373-388
	51	Can academic writing retreats function as wellbeing interventions?	Eardley, AF; Banister, E; Fletcher, M	2021	JOURNAL OF FURTHER AND HIGHER EDUCATION	45(2)	183-196
	52	Writing Instructions at a University and Identity Issues: A Systemic Functional Linguistics Perspective	Kanwal, N; Qadir, SA; Shaukat, K	2021	INTERNATIONAL JOURNAL OF EMERGING TECHNOLOGIES IN LEARNING	16(6)	275-285
	53	Academic writing for publication: Putting the 'international' into context	Getahun, DA; Hammad, W; Robinson-Pant, A	2021	RESEARCH IN COMPARATIVE AND INTERNATIONAL EDUCATION	16(2)	160-180
	54	Feedback as a space for academic social practice in doctoral writing groups	Chakraborty, D; Soyoof, A; Moharami, M; Utami, AD; Zeng, SR; Cong-Lem, N; Hradsky, D; Maestre, JL; Foomani, EM; Pretorius, L	2021	EDUCATIONAL AND DEVELOPMENTAL PSYCHOLOGIST	38(2)	238-248
	55	Simple, Yet Complex: Pre-Service Teachers' Conceptions of Plagiarism at a Norwegian University	Merkel, W	2021	SCANDINAVIAN JOURNAL OF EDUCATIONAL RESEARCH	66(6)	923-935
	56	Proactive learner empowerment: towards a transformative academic integrity approach for English language learners	Khoo, E; Kang, S	2022	INTERNATIONAL JOURNAL FOR EDUCATIONAL INTEGRITY	18	1-24
	57	Student engagement with automated feedback on academic writing: a study on Uyghur ethnic minority students in China	Zhang, Z; Xu, L	2022	JOURNAL OF MULTILINGUAL AND MULTICULTURAL DEVELOPMENT		1-14
	58	Breathing our way into mindful academic writing: a collaborative autoethnography of an online writing community	Woloshyn, V; Obradovc-Ratkovic, S; Julien, K; Rebek, JL; Sen, AP	2022	JOURNAL OF FURTHER AND HIGHER EDUCATION	46(8)	1135-1148
	59	An In-Depth Glimpse into Research on Academic Writing	Raitskaya, L; Tikhonova, E	2022	JOURNAL OF LANGUAGE AND EDUCATION	8(2)	5-16
	60	Let's Talk About Writing Support for Plurilingual Graduate Students: A Collaborative Autoethnography	Gagne, A; Mcintosh, M; Herath, S; Fowler, MA; Kim, J; Baxan, V; Danilina, E Fowler, MA	2022	TESL CANADA JOURNAL	40(1)	81-106
	61	Academics without publications are just like imperial concubines without sons': the 'new times' of Chinese higher education	Xu, W; Poole, A	2022	JOURNAL OF EDUCATION POLICY		1-18
Citation search	1	Identity, voice and agency in two EAL doctoral writing contexts	Morena Botelho de Magalhães; Sara Cotterall; Diego Mideros	2019	JOURNAL OF SECOND LANGUAGE WRITING	43	4-14
	2	Student beliefs and attitudes about authorial identity in academic writing	Gail Pittam; James Elander; Joanne Lusher; Pauline Fox;	2009	STUDIES IN HIGHER EDUCATION	34(2)	153-170
	3	Voice in academic writing: The rhetorical construction of author identity in blind manuscript review	Paul Kei Matsuda; Christine M. Tardy	2007	ENGLISH FOR SPECIFIC PURPOSES	26(2)	235-249
Google search	1	Discoursal scholarly identity in research writing	Qi Qi; Cecilia Guanfang Zhao	2023	JOURNAL OF SECOND LANGUAGE WRITING	62	101052
	2	‘‘Blessed in my own way:’’ Pedagogical affordances for dialogical voice construction in multilingual student writing	A. Suresh Canagarajah	2015	JOURNAL OF SECOND LANGUAGE WRITING	27	122-139
